# Supplementary material for: Synthesis and characterization of CuO@S-doped g-C3N4 based nanocomposites for binder-free sensor applications
Source: Royal Society of Chemistry journal article supplement (doi:10.1039/d2ra04752g), 2022-01-01
Supplement: d2ra04752g1.pdf [file d2ra04752g1.pdf]

## Supporting Information

### **Synthesis and characterization of CuO@S-doped g-C<sub>3</sub>N<sub>4</sub> based nanocomposites for binder-free sensor applications**

Nigussie Alebachew<sup>1</sup>, H. C. Ananda Murthy<sup>1,2\*</sup>, Bedassa Abdissa<sup>1</sup>, Taye B. Demissie<sup>3,\*</sup>, Karel G. von Eschwege<sup>4</sup>, Ernst H. G. Langner<sup>4</sup>, and Liza Coetsee-Hugo<sup>4</sup>

<sup>1</sup>*Department of Applied chemistry, School of Applied Natural Sciences, Adama Science and Technology University, Adama, P.O. Box 1888, Ethiopia*

<sup>2</sup>*Department of Prosthodontics, Saveetha Dental College & Hospital, Saveetha Institute of Medical and technical science (SIMAT), Saveetha University, Chennai-600077, Tamil Nadu, India*

<sup>3</sup>*Department of Chemistry, University of Botswana, Pbag UB 00704, Gaborone, Botswana*

<sup>4</sup>*Department of Chemistry, University of the Free State, P.O Box 339, Bloemfontein, South Africa*

*Corresponding author:* Demissie: [demissiet@ub.ac.bw](mailto:demissiet@ub.ac.bw) and Murthy: [anandkps350@gmail.com](mailto:anandkps350@gmail.com)

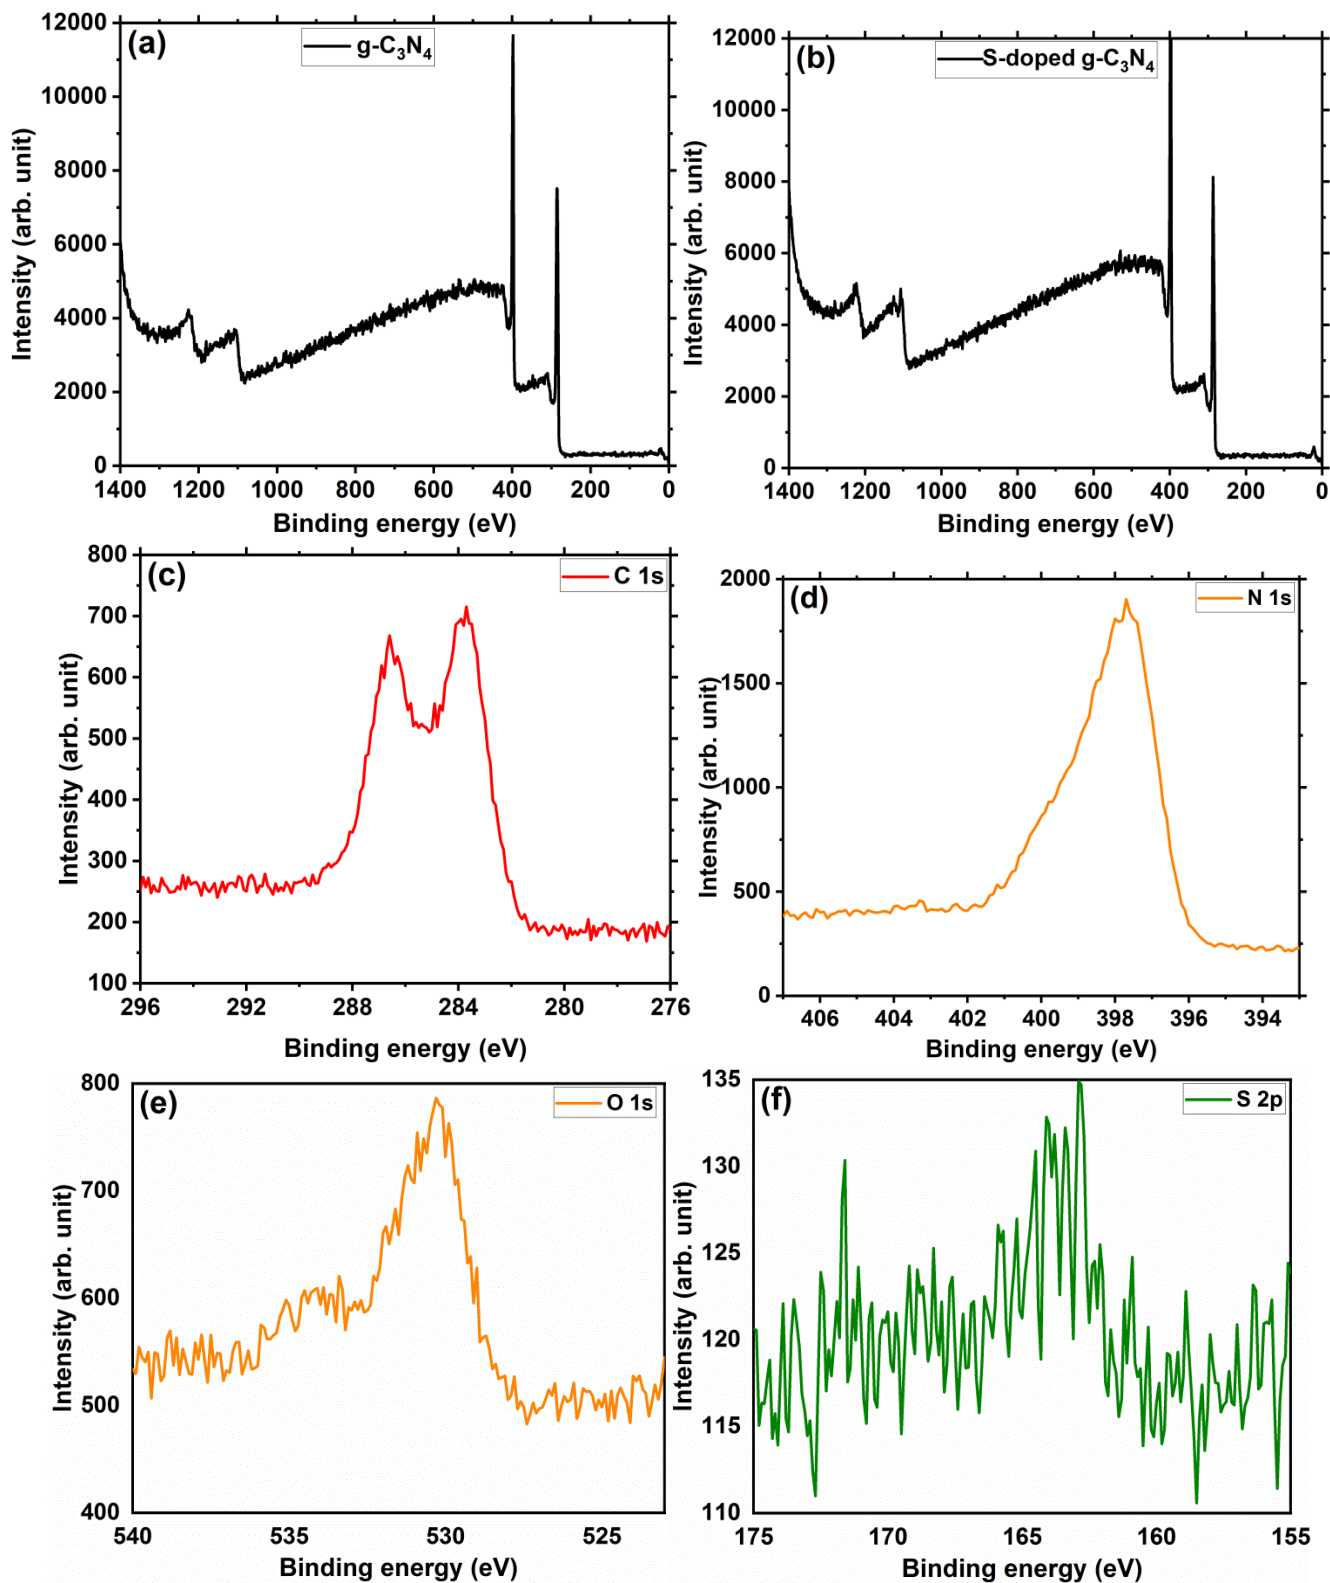

Figure S1: (a) XPS survey of g-C<sub>3</sub>N<sub>4</sub>; (b) XPS survey of S-doped g-C<sub>3</sub>N<sub>4</sub>; and high resolution spectra of the constituent elements for: (c) C 1s, (d) N 1s, (e) O 1s, and (f) S 2p of S-doped g-C<sub>3</sub>N<sub>4</sub>.

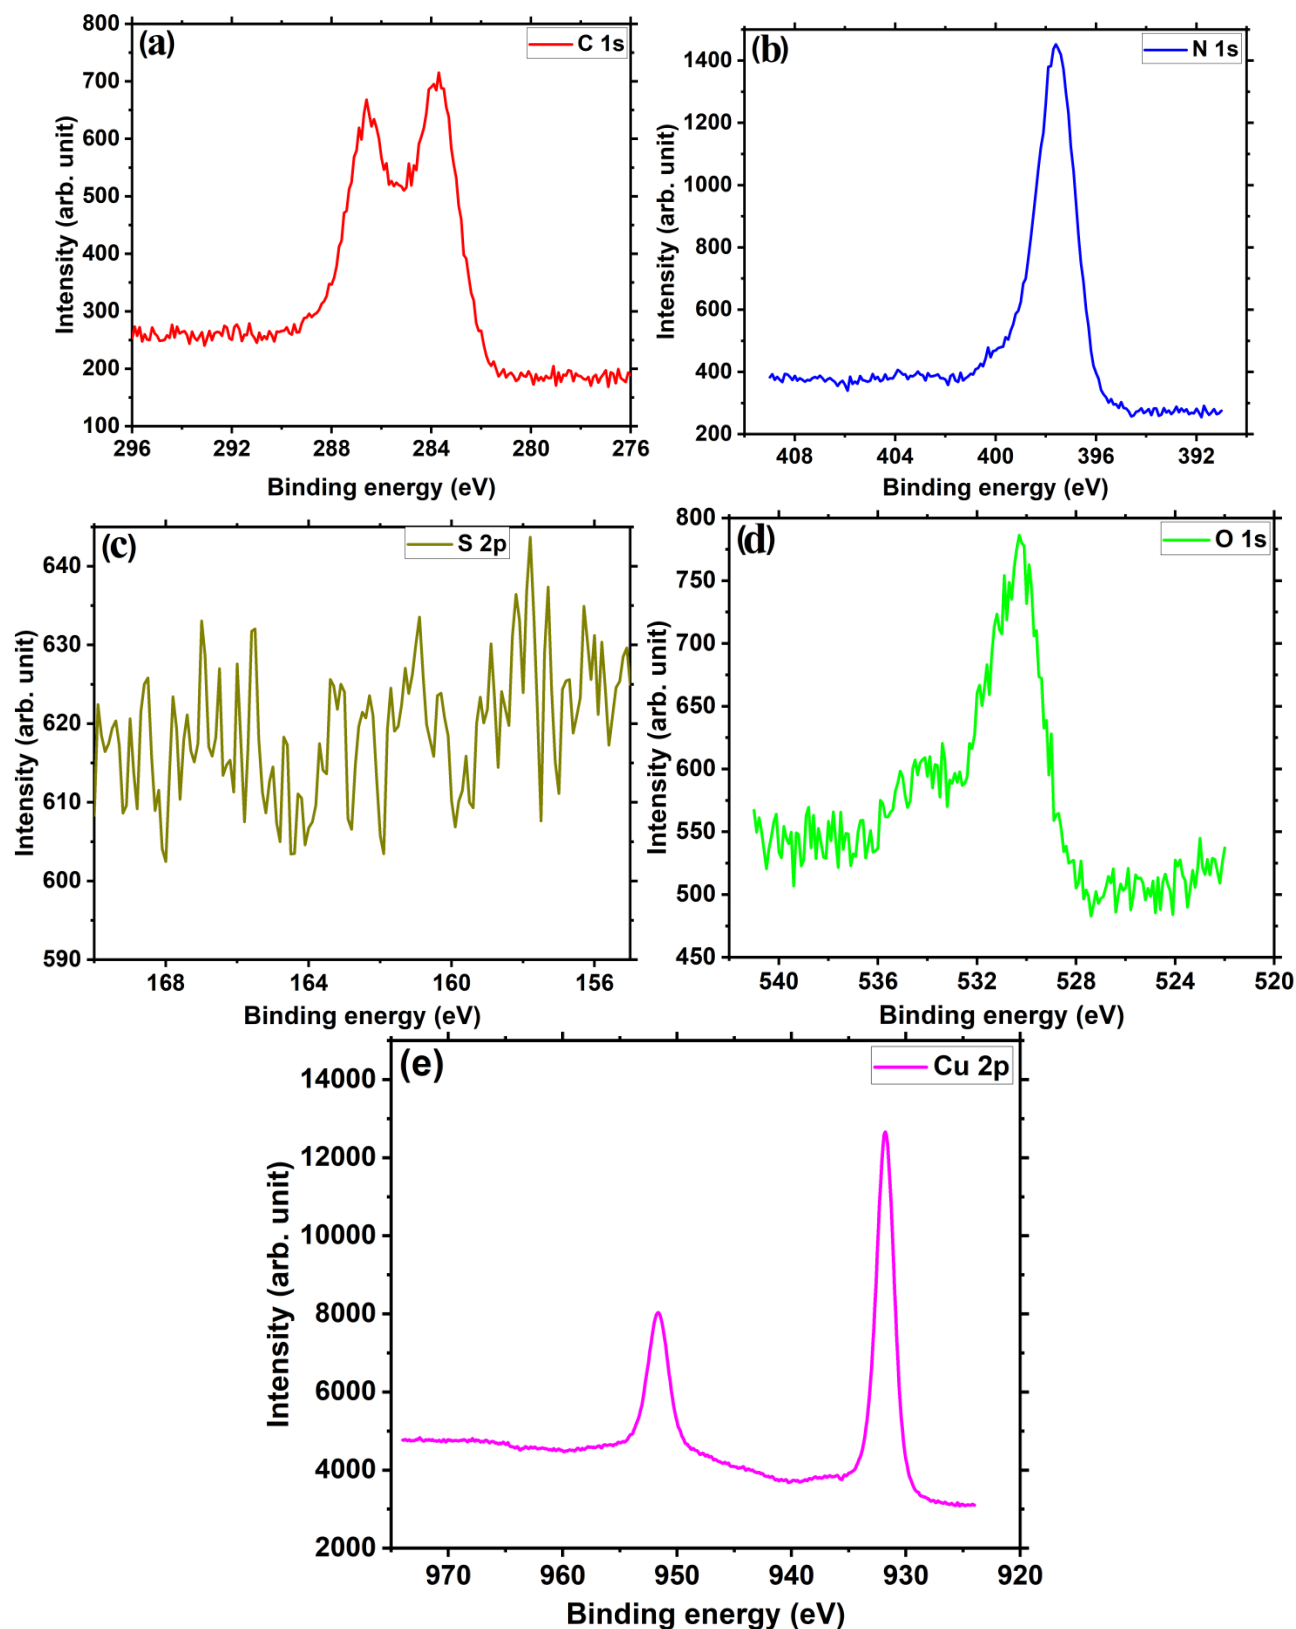

Figure S2: High resolution spectra of the constituent elements S 2p, C 1s, N 1s, O 1s, and Cu 2p of CuO@S-doped g-C<sub>3</sub>N<sub>4</sub> nanocomposites.

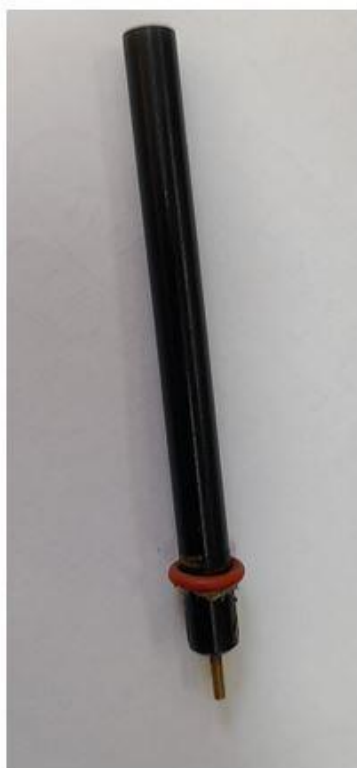

**a**

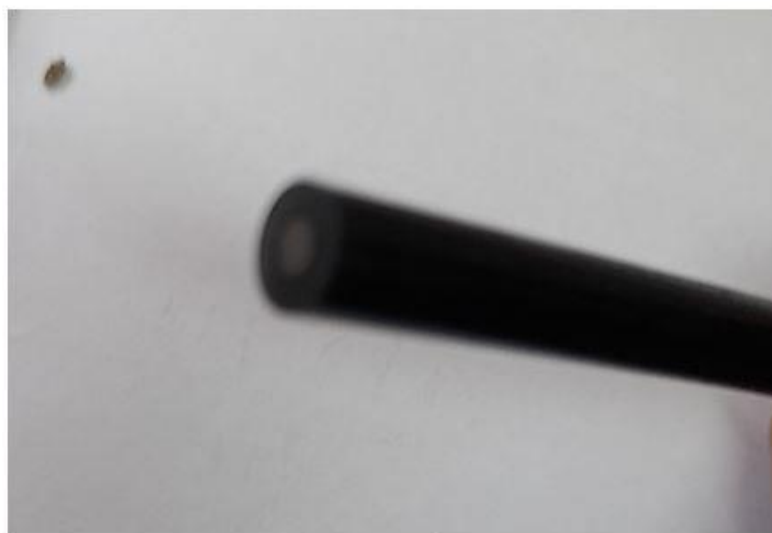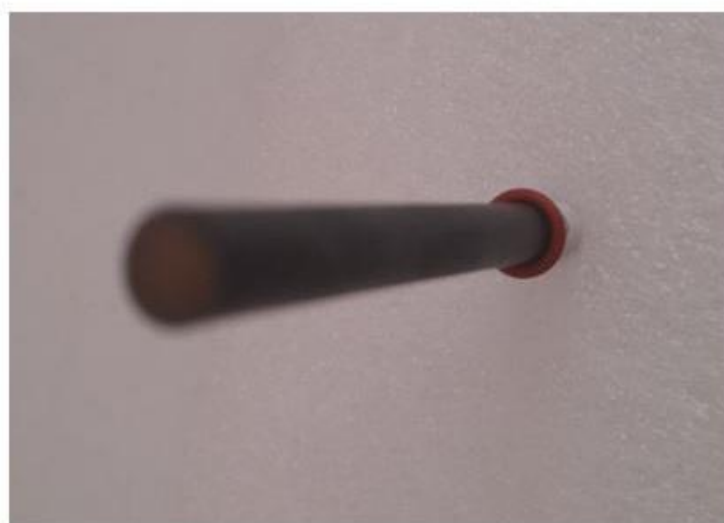

**b**

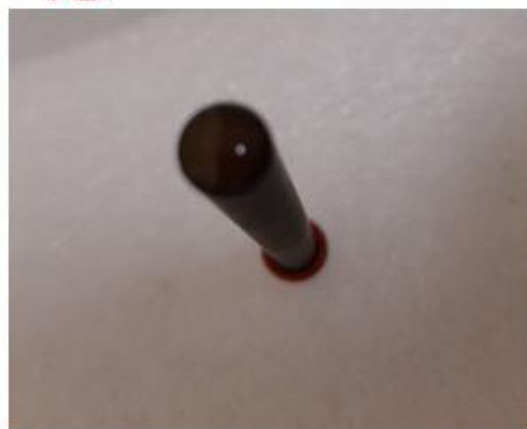

Figure S3. Photographs of (a) glassy carbon electrode, and (b) the CuO@S-doped g-C<sub>3</sub>N<sub>4</sub> nanocomposites modified glassy carbon electrode (*see the top side of the electrodes*)
